# Supplementary material
Source: publisher figshare collection journal article supplement (https://frontiersin.figshare.com/ndownloader/files/13383566)
Supplement: Supplementary file 1 [file 13383566]

| **Garden** | **Gardener** | **Pre-study perceived water use (mean total L)** | **Mean water use per event (L)** | **Post-study perceived water use (mean total L)** | **Pre vs post water use understanding** | **Watering frequency** | **Crops (self reported)** | **Crop water needs** | **crop cover (%)** | **soil organic matter (%)** | **mulch/straw cover (%)** |
| --- | --- | --- | --- | --- | --- | --- | --- | --- | --- | --- | --- |
| 1 | 1 | I don't know | 70 | 65 | Better understanding | 1-2 week | tomato, squash, sweet peppers | Low | 14.6 | 23.4 | 0 |
| 1 | 2 | I don't know | 250.1 | 662 | Overestimate | 1-2 week | tomato, kale, Japanese cucumber, kebacha squash | Medium | 70 | 17.4 | 0 |
| 1 | 3 | I don't know | 238.7 | 300 | Overestimate | 2-4 week | tomato, string beans, corn, squash, bell pepper, sweet pepper, eggplant, melon | Medium | 39.5 | 24.2 | 0 |
| 1 | 4 | 15 | 35.4 | I don't know | Poor understanding | 1-2 week | tomatoes, cabbage, onion, garlic, zucchini, cucumbers, artichokes, cauliflower, brussel sprouts, butternut squash, bell peppers | Medium | 20.67 | 22.77 | 6.5 |
| 1 | 5 | I don't know | 2167.9 | 2271 | Overestimate | 1-2 week | tomatoes, corn, yellow squash, orkra, basil, beets, parsely, scarlet runner beans, cucumber, asparagus, rosemary, strawberries, lemon grass, garlic chives, arugula | Medium | 7 | 18.57 | 9 |
| 2 | 6 | 45 | 435 | 50 | Underestimate | 3-5 week | tomato, summer squash, winter squash, cucumber, beans, chili, zinnias, marigolds, goji, kale | Medium | 30 | 16.7 | 87.5 |
| 2 | 7 | I don't know | 55.1 | 52 | Better understanding | 1-2 week | tomato, cucumber, kale, zucchini, walking onion, French bean, pepper, orange honeydew, basil | High | 36.8 | 14.1 | 60 |
| 2 | 8 | I don't know | 60.4 | 38 | Better understanding | 1-2 week | tomato, cucumber, squash, Chinese long bean, radish, Chinese garlic chives, watermelon, jalapeno, dahlia, snow peas, pumpkin, wild ginseng, cilantro, sweet potato, savoy cabbage | Medium | 10.4 | 24.8 | 0 |
| 2 | 9 | I don't know | 35.7 | 20 | Better understanding | daily | cherry tomato, peppers, zinnias, marigolds, eggplant, rakkyo, columbine | Low | 18.6 | 25.8 | 45 |
| 2 | 10 | 19 | 526.5 | I don't know | Poor understanding | 1-2 week | tomato, summer squash, winter squash, green beans, zucchini | Low | 31 | 18.8 | 82.5 |
| 3 | 11 | 95 | 210.7 | 757 | Overestimate | 1-2 week | tomato, tomatillos, zucchini, hot peppers, cucumbers, eggplant, carrots | Medium | 36 | 28.7 | 0 |
| 3 | 12 | I don't know | 83.1 | 80 | Better understanding | daily | tomato, broccoli, arugula, snow pea, nasturtium, poppy | Low | 14.3 | 23.3 | 0 |
| 3 | 13 | 284 | 300.9 | 200 | Underestimate | 1-2 week | raspberry | Low | 85 | 22.4 | 85 |
| 3 | 14 | 38 | 74 | I don't know | Poor understanding | 1-2 week | tomato, mizuna, radish, parsley, turnip, cilantro, arugula, eggplant, lettuce, pepper | Low | 11.2 | 28.8 | 12.5 |
| 3 | 15 | I don't know | 139.9 | I don't know | Poor understanding | 1-2 week | tomato, bell pepper, potatoes, dill, oregano, tarragon, comfrey, borage, calendula, marigolds, sunflower, clover, fennel | Medium | 23.4 | 20.2 | 15 |
| 4 | 16 | I don't know | 300.5 | I don't know | Poor understanding | 3-5 week | tomato, squash, kale, beans, pepper, celery, chard, lettuce, borage, sunflower | Medium | 15.8 | 14.9 | 0 |
| 4 | 17 | I don't know | 68.2 | 68 | Better understanding | 3-5 week | tomato, corn, mustard greens, eggplant, zucchini, pepper, grape, cucumber, cilantro, parsley, columbine, radish, strawberry, cosmos, chard, winter squash, catnip, nasturtium, rose, iris lisianthus, onion, purslane, bean, borage, kale, mullein | High | 14.5 | 9.7 | 0 |
| 4 | 18 | I don't know | 319.6 | NA | NA | 3-5 week | tomato, squash, pole beans, lavender, salvias, potatoes, rose, gladiolas, culinary herbs | Low | 11.7 | 9.4 | 0 |
| 4 | 19 | I don't know | 214.5 | NA | NA | daily | cucumbers, eggplant, tomatoes, peppers, melon, beans, sunflowers, basil, sage, thyme, flowers, kale, squash, artichokes, rhubarb | Medium | 35.6 | 11.24 | 11.5 |
| 4 | 20 | I don't know | 266.6 | 547 | Overestimate | 3-5 week | tomato, asparagus, lettuce, beans (shelling, fresh), summer squash, winter squash, cucumbers, rhubarb, basil, zinnias, snapdragons, celeriac, popcorn, onions, leeks | High | 30 | 9.8 | 0 |
